# Supplementary material for: Spreading and drying impact on printed pattern accuracy due to phase separation of a colloidal ink
Source: Springer Nature journal article supplement (doi:10.1007/s00396-018-4372-1), 2018-08-28
Supplement: MOESM2 [file 16080658]

Spreading and Drying Impact on Printed Pattern Accuracy Due to Phase Separation of a Colloidal Ink

Zhi Tao a,b, Brice Le Borgne a, Tayeb Mohammed-Brahim a, Emmanuel Jacques a, Maxime Harnois a,*

*a Institut d’électronique et des Télécommunication de Rennes, UMR CNRS 6164, Université de Rennes 1, Campus de Beaulieu, 35042 RENNES Cedex (France)*

*b School of Electronic Science and Engineering, Southeast University, Nanjing 210096, People’s Republic of China*

**SUPPORTING MATERIALS**

**1. Figures**

**
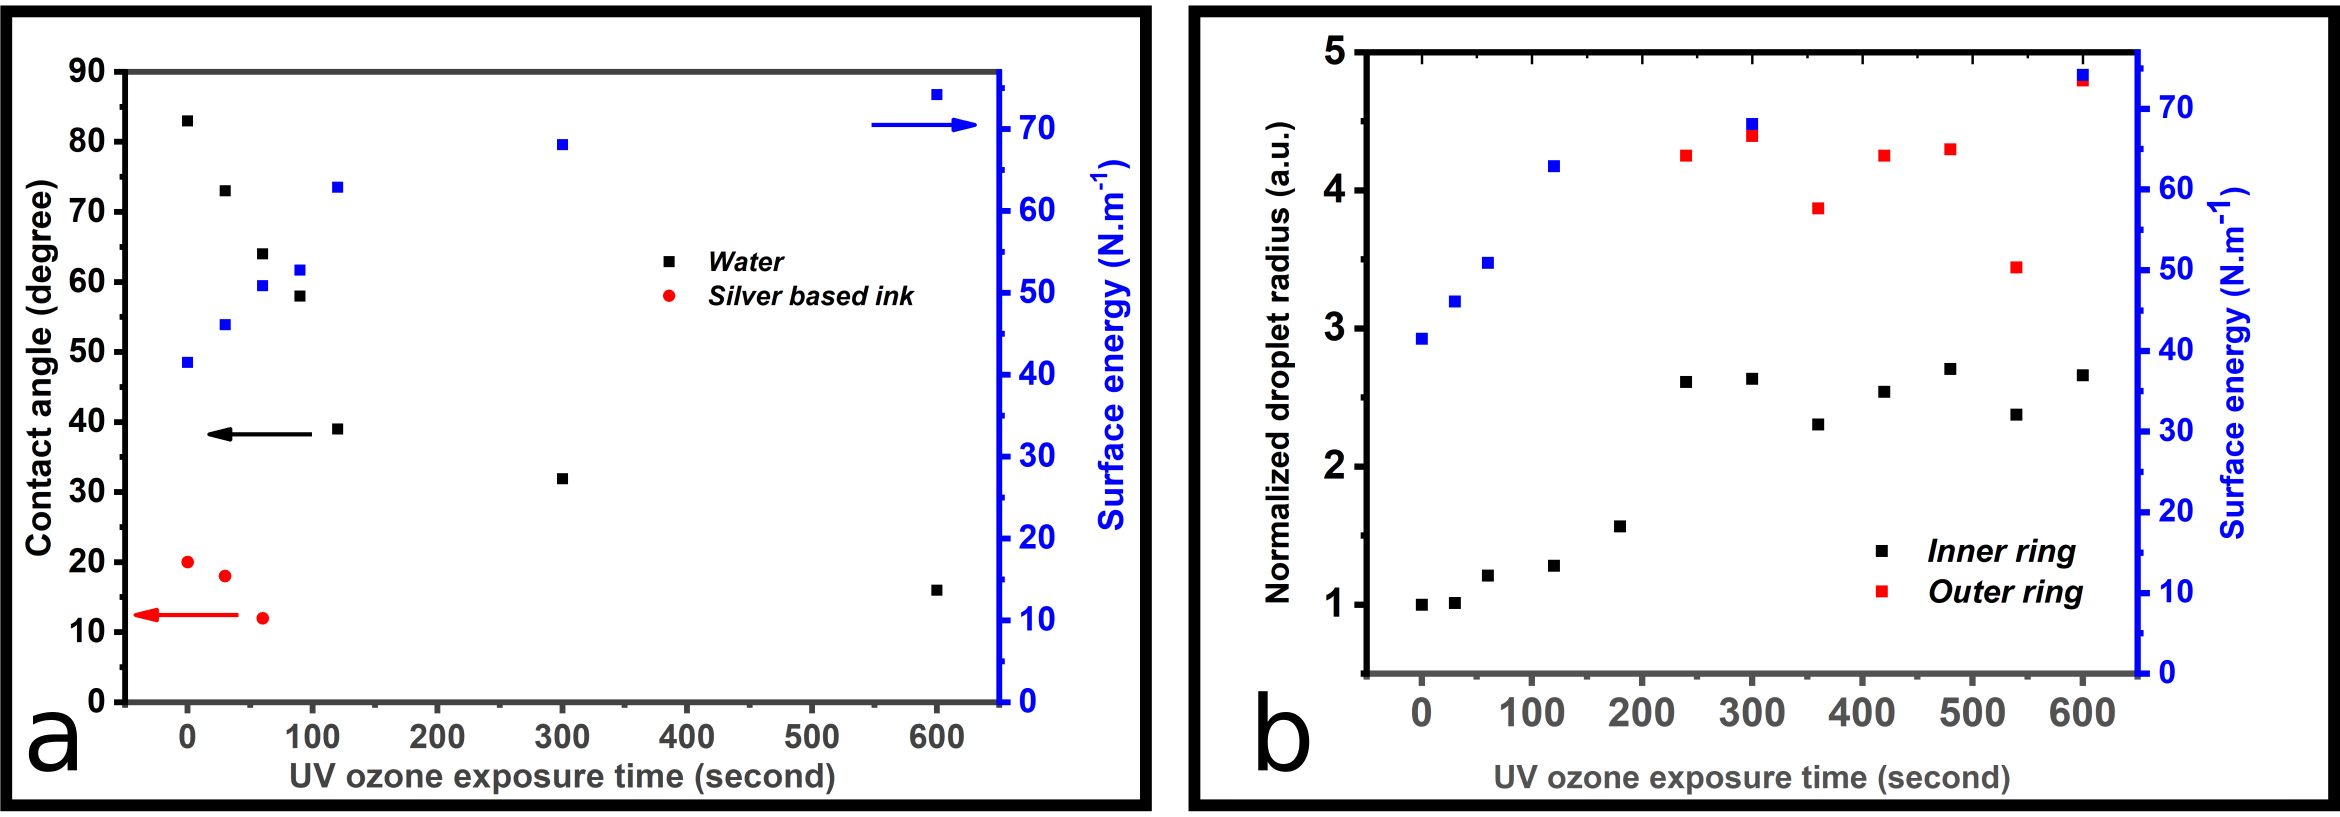
**

**Figure S1:** *Spreading and wetting behavior of the droplets a)**Water contact angle and silver based ink contact angle (left axis) as function of UV ozone exposure time . Note that, after 60 seconds silver based ink wets the surface totally and contact angle could not be measured. Surface free energy as function of UV ozone exposure time is plotted on right axis. Values confirm that the more the Su8 surface is exposed to UV ozone treatment, the more the surface becomes hydrophilic. b) Normalized droplet radii (inner and outer rings) and surface energy as function of UV ozone exposure time. The normalized radius show that the inner ring is about 2.5 times larger after 600s of exposure to UV ozone. The outer ring radius remains relatively consistent from its appearance (after 240s) to 600s exposure time.*


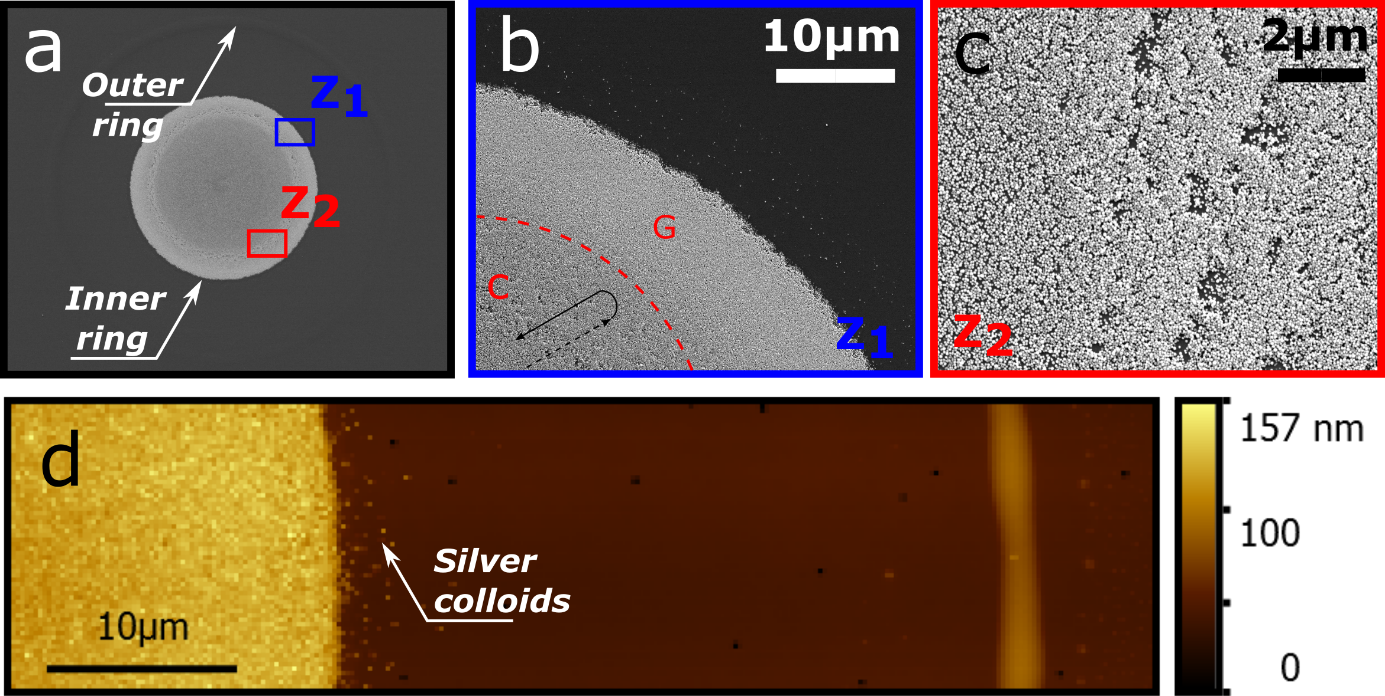


**Figure S2:** *SEM pictures showing: a) dried droplet, b) A zoom Z1 showing the border between cap and foot; cap is divided in two regions named C and G. foot is the darkest region of the image; Black arrows shows internal flow in the C region during drying. c) A zoom Z2 showing inhomogeneity of dried nanoparticles in C region. d) AFM scan showing: colloid rich region (yellow region on left side of image) and polymer rich region (right side of the image). AFM image shows the only few amount of silver colloids can be found at the border of colloid and polymer rich region.*

**Discussion:** Zoom in SEM optical observations performed at the border between the cap and the foot (Z1) and inside the cap (Z2) provide deeper information about microscopic structure of colloids after drying. In Z1, two regions can be clearly distinguished. “G mark” shows a region where colloids are densely packed. This region forms a band at the periphery of the cap. Inside the cap (region marked C), colloids show less densely packed structure. We suggest that during drying a gel band is formed where there is no flow. In the C region, radial circulation flow occurs however colloids can’t go through the gel band towards the foot. Consequently, coffee stain occurs inside the C regions (see in figures 2c and 2f). Such hypothesis is in good agreement with literature.[40]


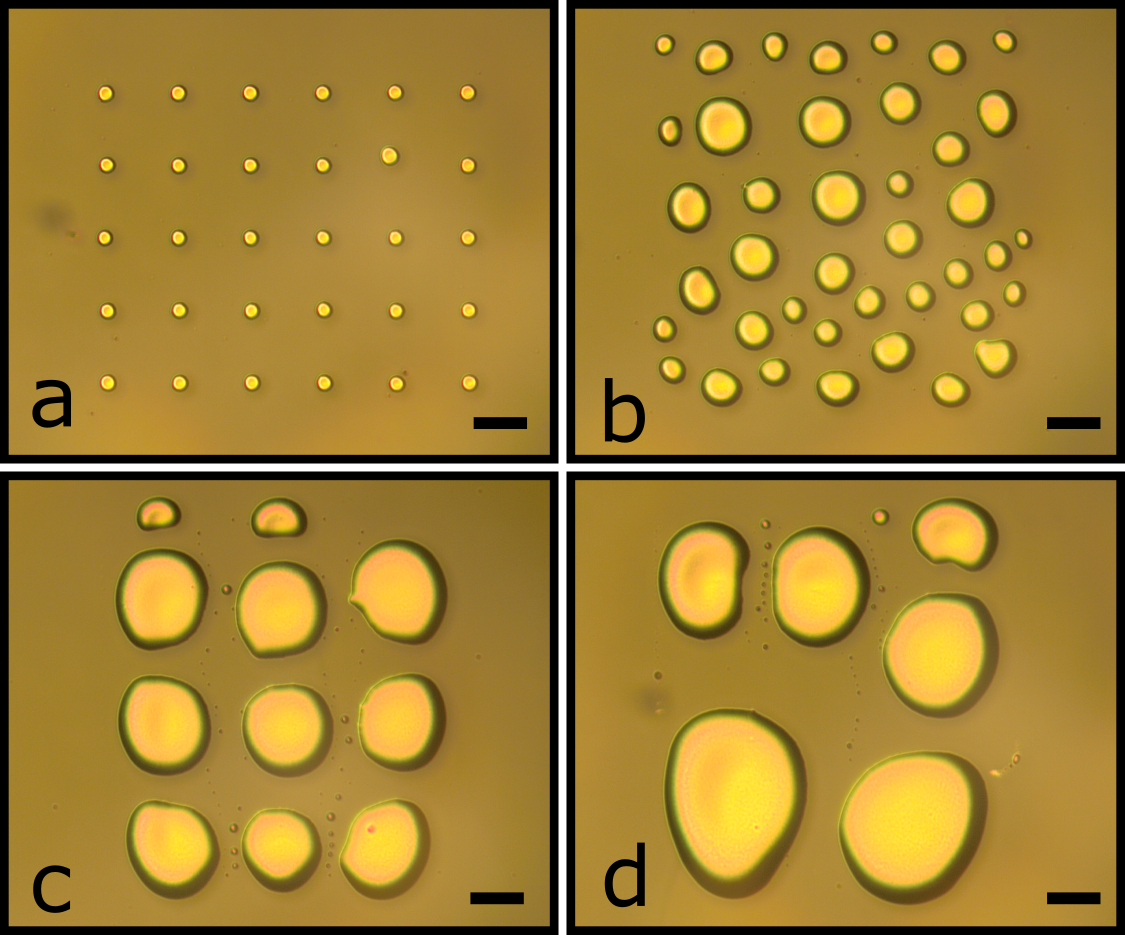


**Figure S3:** Square shaped patterns printed on polymeric surface (Su8 2000.5 MicroChem) without UV ozone treatment. Jetting frequency equals 1KHz and drop spacing equals: a) 100 µm leading to isolated droplets, b) 20 µm, c) 10µm, d) 5µm. In images b), c) and d), the printing parameters have been adjusted to overlap adjacent droplet leading to the coalescence of droplets and the formation of a stable pattern.

Scale bars equal 50µm.

Matrix of isolated droplet is obtained in figure a) because drop spacing (I.e., the distance between the centers of two adjacent droplets) is higher than droplet diameter. Figures S3b, 3c and 3d shows non-continuous patterns even if drop spacing is lower than droplets diameter. Such phenomena is due to fluid instability on hydrophobic surfaces when triple contact line is not firmly pinned.


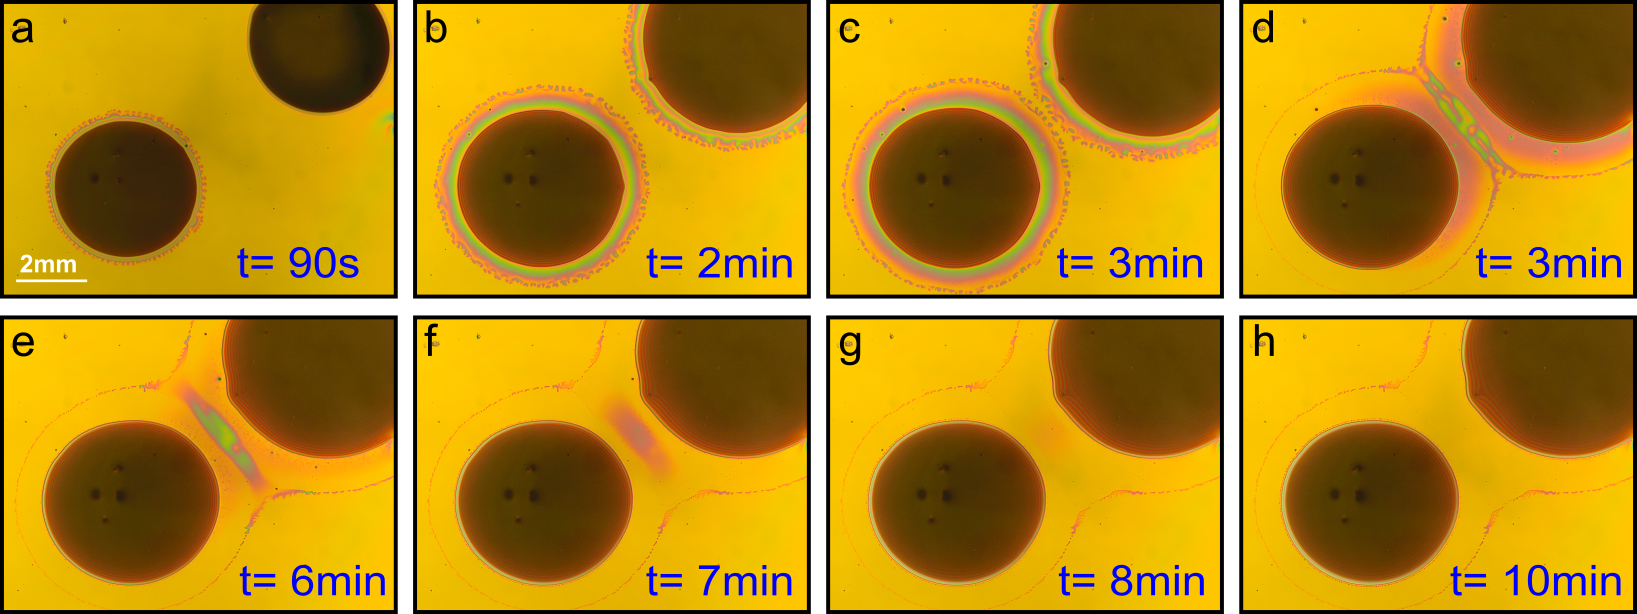


**Figure S4:** Optical images of two droplets successively drop casted on Su8 surface exposed to 6 minutes UV ozone as function of time. Droplet in the bottom left has been deposited at first. Images a to c show that the two droplets spread with same mechanism than for isolated droplet. In image d, the two contact line collapse and form the same outer ring than this one observed when droplet are printed. Images e to h show the drying step of polymer rich region.


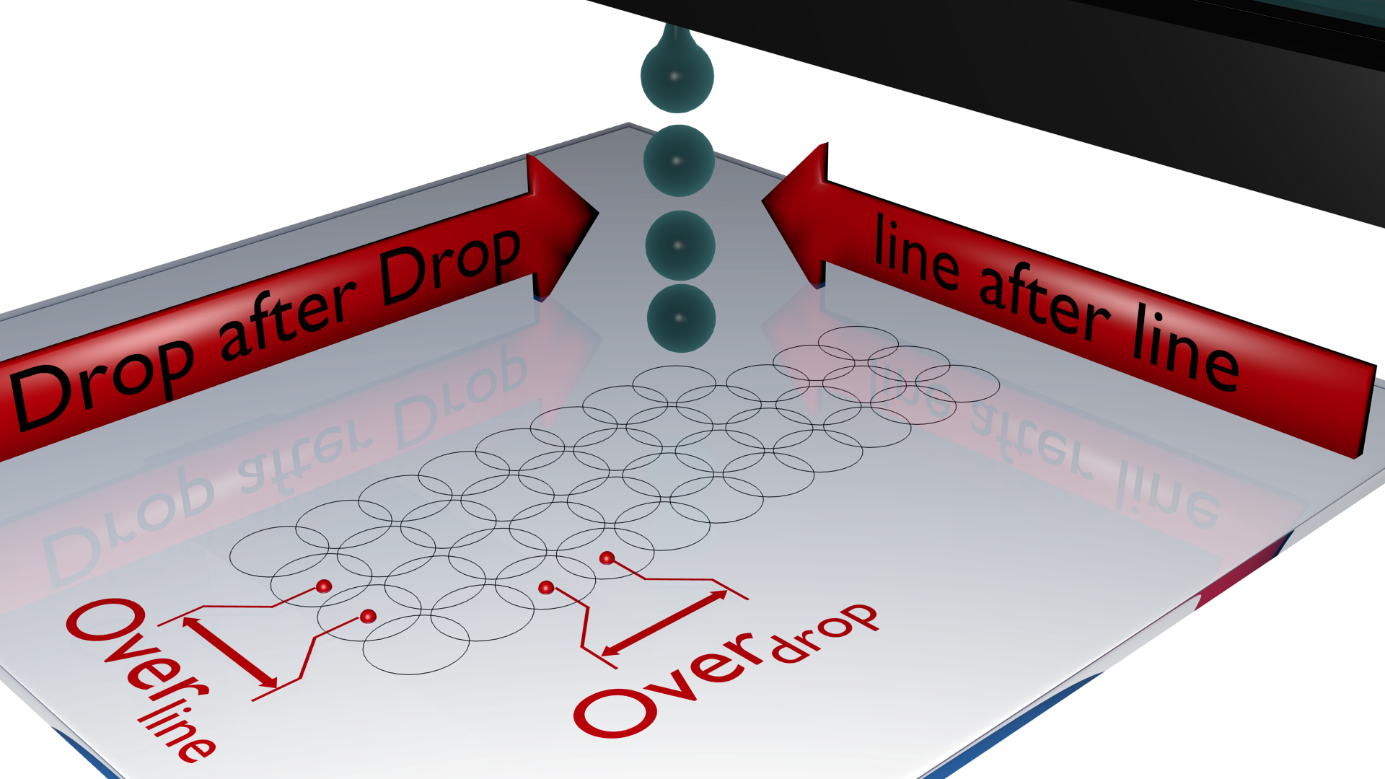


**Figure S5:** 3D scheme showing working principle of DoD inkjet printing for square shaped patterns. Overdrop is relative to droplets spacing that coalesce to form a line. Overline is relative to line spacing parameters in order to form square shaped patterns. Note that “Drop after Drop” and “line after line” are relative to X axis displacement and Y axis displacement, respectively. Note that the black circle does not highlight materials such as silver colloids, but the three-phase contact line of a dried droplet.

**2. Videos**

**Video S1:** 20s-movie at 25 frame/s showing jetting of silver based in droplets that respect jettable criterions.
